# Supplementary material
Source: Springer Nature journal article supplement (https://www.springermedizin.de/resource/supplementary/12874_2011_665_MOESM2_ESM.pdf/9432358)
Supplement: MOESM2 [file 9432358]

N=727 clients attended SCSO  
during study period

N=175 clients not eligible to participate

N=552 clients approached to  
participate

N=169 clients refused participation

N=383 provided consent and  
completed survey

N=383 invited to provide BCO  
measure

N=39 refused  
N=14 malfunctioning equipment

N=330 provided BCO measure

N=304 reported smoking in  
previous 12 hours and were  
included in validation analysis
